# Supplementary material for: MOF–cation exchange resin composites and their use for water decontamination
Source: Royal Society of Chemistry journal article supplement (doi:10.1039/c8qi00696b), 2018-01-01
Supplement: c8qi00696b1.pdf [file c8qi00696b1.pdf]

1  
2  
3  
4  
5  
6  
7  
8  
9  
10  
11  
12  
13  
14  
15  
16  
17  
18  
19  
20  
21  
22  
23  
24  
25  
26

## Supporting information

MOF – cation exchange resin composites and their use for water decontamination

Ping He,<sup>a</sup> Kok-Giap Haw,<sup>a</sup> Jiawang Ren,<sup>a</sup> Qianrong Fang,<sup>a</sup> Shilun Qiu,<sup>a</sup>, Valentin Valtchev<sup>a,b\*</sup>

<sup>a</sup> State Key Laboratory of Inorganic Synthesis and Preparative Chemistry, Jilin University, Changchun 130012, China.

<sup>b</sup> Normandie Univ, ENSICAEN, UNICAEN, CNRS, Laboratoire Catalyse et Spectrochimie, 6 Marechal Juin, 14050 Caen, France.

E-mail : [valentin.valtchev@ensicaen.fr](mailto:valentin.valtchev@ensicaen.fr)

1

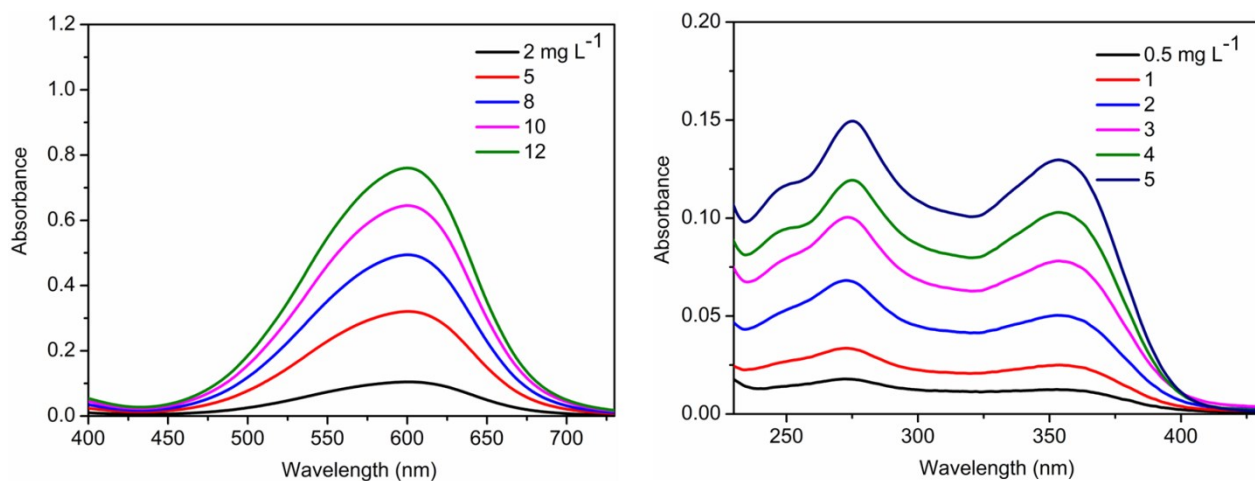

4 **Fig. S1** UV-vis absorption spectra of MB (left) and OTC (right) solutions at various  
5 concentrations.

6

7

8

9

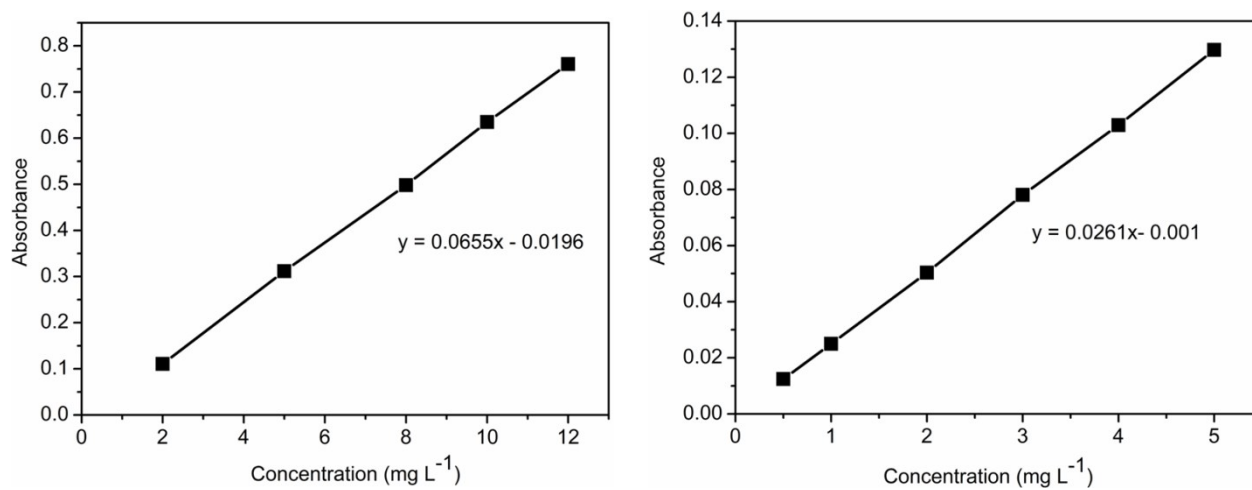

11 **Fig. S2** Plots of absorbance of the MB (left) and OTC (right) solutions with respect to the  
12 concentrations at  $\lambda_{\text{max}}$  of 600 and 368 nm, respectively.

13

14

1

2

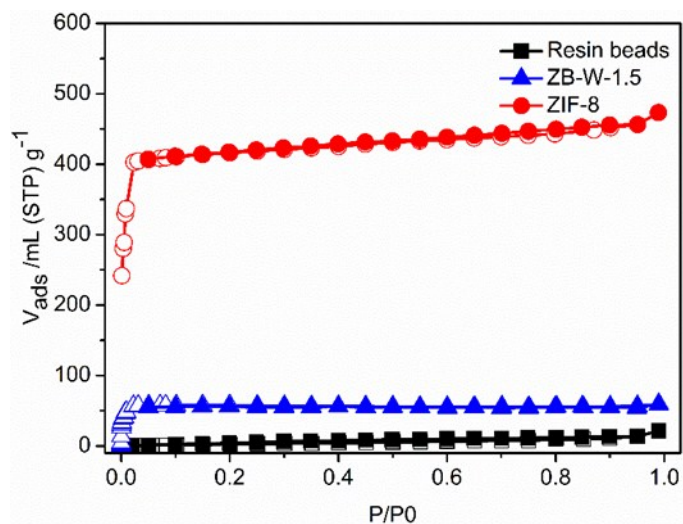

3

4 **Fig.S3** Nitrogen sorption isotherms of resin beads, ZB-W-1.5 and ZIF-8. (Adsorption - full symbols;  
5 Desorption - empty symbols).

6

7

8

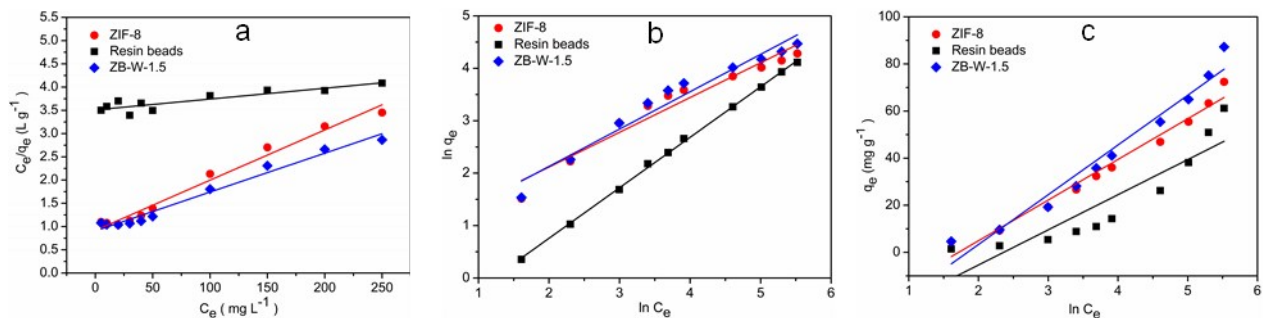

9

10 **Fig. S4** Analyses of adsorption isotherm of MB by (a) Langmuir, (b) Freundlich and (c) Temkin  
11 isotherms (25 °C,  $C_0 = 5-250 \text{ mg L}^{-1}$ , ZIF-8=0.2 g L<sup>-1</sup>, resin beads=1 g L<sup>-1</sup>, ZB-W-1.5=1 g L<sup>-1</sup>).

12

13

14

15

1

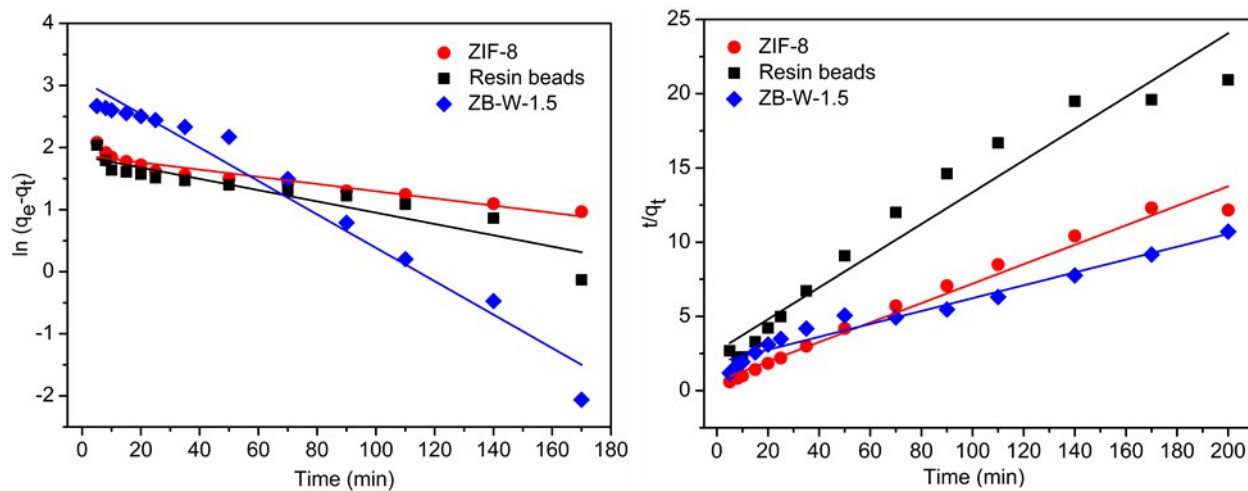

2

3 **Fig. S5** Pseudo-first-order kinetics (left) and pseudo-second-order kinetics (right) for the  
4 adsorption of MB molecule.

5

6

7

8

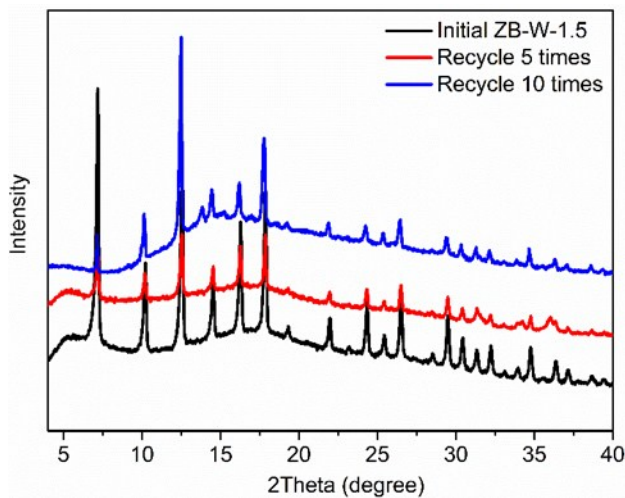

9

10 **Fig. S6** Powder XRD patterns of the initial ZB-W-1.5 and ZB-W-1.5 after 5 and 10 adsorption-  
11 desorption cycles.

12

1

2

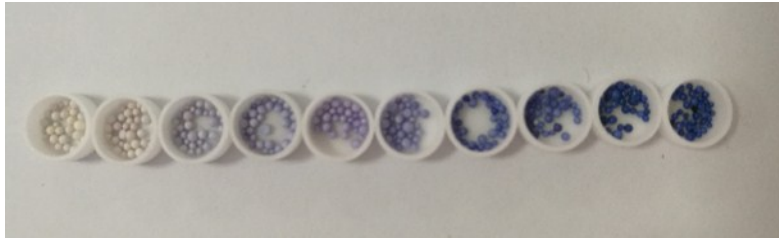

3

4

5

6

7 **Fig. S7** Optical photograph of the composite adsorbent collected after adsorption at the initial  
8 concentrations ranging from 5 to 250 mg L<sup>-1</sup> (from left to right).

9

10

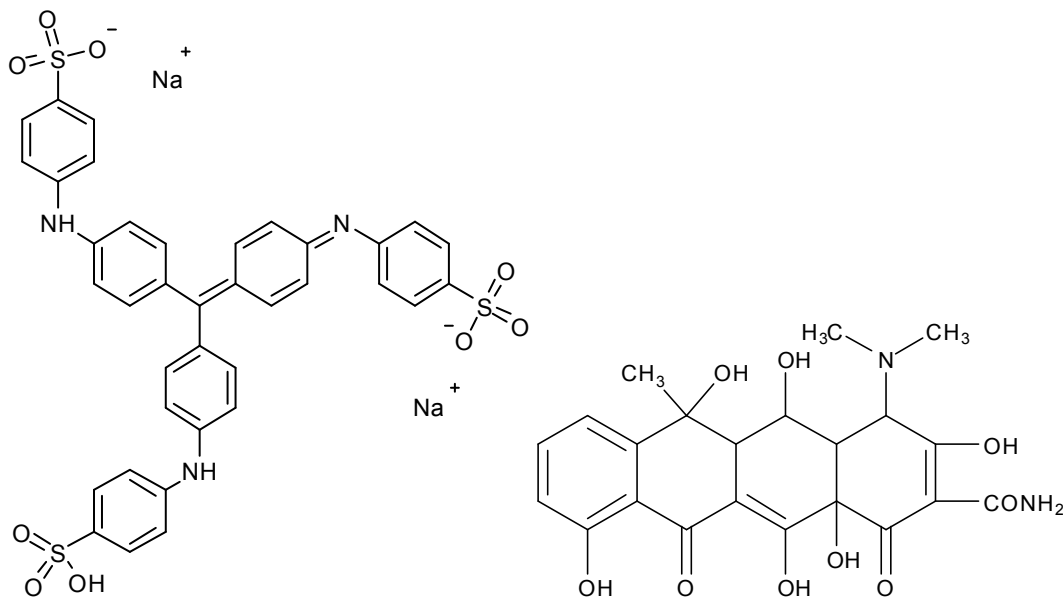

11

12

13 **Fig. S8** Molecule structures of methyl blue (left) and oxytetracycline (right).

14
